# Supplementary material for: OCT1 Is a Poor Prognostic Factor for Breast Cancer Patients and Promotes Cell Proliferation via Inducing NCAPH
Source: MDPI journal article supplement (doi:10.3390/ijms222111505), 2021-10-25
Supplement: s1 [file s1]

# OCT1 is a poor prognostic factor for breast cancer patients and promotes cell proliferation via inducing NCAPH

Takuya Ogura <sup>1,2,3</sup>, Kotaro Azuma <sup>1</sup>, Junichiro Sato <sup>4</sup>, Keiichi Kinowaki <sup>4</sup>, Ken-Ichi Takayama <sup>1</sup>, Toshihiko Takeiwa <sup>1</sup>, Hidetaka Kawabata <sup>2</sup>, Satoshi Inoue <sup>1,5,\*</sup>

<sup>1</sup> Department of Systems Aging Science and Medicine, Tokyo Metropolitan Institute of Gerontology, 35-2 Sakae-cho, Itabashi-ku, Tokyo 173-0015, Japan; ogutaku0120@gmail.com (T.O.); azumak@m.u-tokyo.ac.jp (K.A.); takayama@tmig.or.jp (K.T.); ttakeiwa@tmig.or.jp (T.T.)

<sup>2</sup> Department of Breast and Endocrine Surgery, Toranomon Hospital, 2-2-2 Toranomon, Minato-ku, Tokyo 105-8470, Japan; h-kawabata@toranomon.gr.jp (H.K.)

<sup>3</sup> Department of Systems BioMedicine, Tokyo Medical and Dental University, 1-5-45 Yushima, Bunkyo-ku, Tokyo 113-8510, Japan

<sup>4</sup> Department of Pathology, Toranomon Hospital, 2-2-2 Toranomon, Minato-ku, Tokyo 105-8470, Japan; j.n.sato@nifty.com (J.S.); kinowaki-hok@umin.ac.jp (K.K.)

<sup>5</sup> Division of Systems Medicine and Gene Therapy, Saitama medical University, 1397-1 Yamane, Hidaka-shi, Saitama 350-1241, Japan

\* Correspondence: sinoue@tmig.or.jp; Tel.: +81-3-3964-3241

## Table of contents

|           |         |
|-----------|---------|
| Table S1  | Page 2  |
| Figure S1 | Page 3  |
| Figure S2 | Page 4  |
| Figure S3 | Page 5  |
| Figure S4 | Page 6  |
| Figure S5 | Page 7  |
| Figure S6 | Page 8  |
| Figure S7 | Page 9  |
| Figure S8 | Page 10 |
| Figure S9 | Page 11 |

**Table S1** Sixteen genes commonly regulated by siOCT1 #1 and siOCT1 #2 in MCF-7 cells

| Gene<br>symbol   | Description                                                      | siCont. vs siOCT1<br>#1<br>Fold change | siCont. vs siOCT1<br>#2<br>Fold change |
|------------------|------------------------------------------------------------------|----------------------------------------|----------------------------------------|
| <i>HIST1H1B</i>  | histone cluster 1, H1b                                           | 14.6                                   | 26.9                                   |
| <i>RRM2</i>      | ribonucleotide reductase M2                                      | 23.4                                   | 23.9                                   |
| <i>HIST1H2BM</i> | histone cluster 1, H2bm                                          | 13.9                                   | 27.5                                   |
| <i>HIST2H3C</i>  | histone cluster 2, H3c                                           | 9.8                                    | 47.0                                   |
| <i>HIST2H3A</i>  | histone cluster 2, H3a                                           | 9.1                                    | 41.1                                   |
| <i>MYB</i>       | v-myb avian myeloblastosis viral oncogene homolog                | 29.7                                   | 14.1                                   |
| <i>CDCA3</i>     | cell division cycle associated 3                                 | 9.4                                    | 20.0                                   |
| <i>MGP</i>       | matrix Gla protein                                               | 10.3                                   | 15.1                                   |
| <i>DTL</i>       | denticleless E3 ubiquitin protein ligase homolog<br>(Drosophila) | 14.1                                   | 10.2                                   |
| <i>NCAPH</i>     | non-SMC condensin I complex subunit H                            | 9.4                                    | 11.0                                   |
| <i>PBK</i>       | PDZ binding kinase                                               | 10.3                                   | 10.2                                   |
| <i>CEP55</i>     | centrosomal protein 55kDa                                        | 15.1                                   | 9.2                                    |
| <i>TMEM64</i>    | transmembrane protein 64                                         | 66.0                                   | 8.6                                    |
| <i>HIST1H1D</i>  | histone cluster 1, H1d                                           | 8.5                                    | 21.8                                   |
| <i>KIF20A</i>    | kinesin family member 20A                                        | 8.3                                    | 26.5                                   |
| <i>HIST1H3I</i>  | histone cluster 1, H3i                                           | 8.2                                    | 19.4                                   |

Genes downregulated by 8 fold change or more in both treatments with siOCT1 #1 and siOCT1 #2 are shown. Ratios of expression levels (expression level with siControl treatment divided by that with siOct1 treatment) are displayed as fold changes. Abbreviation: siCont., siControl.

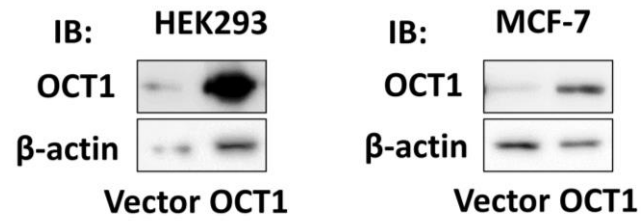

**Figure S1** Specificity of anti-OCT1 antibody. HEK293 cells and MCF-7 cells were transiently transfected with expression vector encoding OCT1 (OCT1). Empty vector (Vector) was used as a negative control. Cell lysates were separated by sodium dodecyl sulfate polyacrylamide gel electrophoresis (SDS-PAGE), and immunoblot analysis was performed. An antibody against  $\beta$ -actin was used as a loading control. IB, immunoblot.

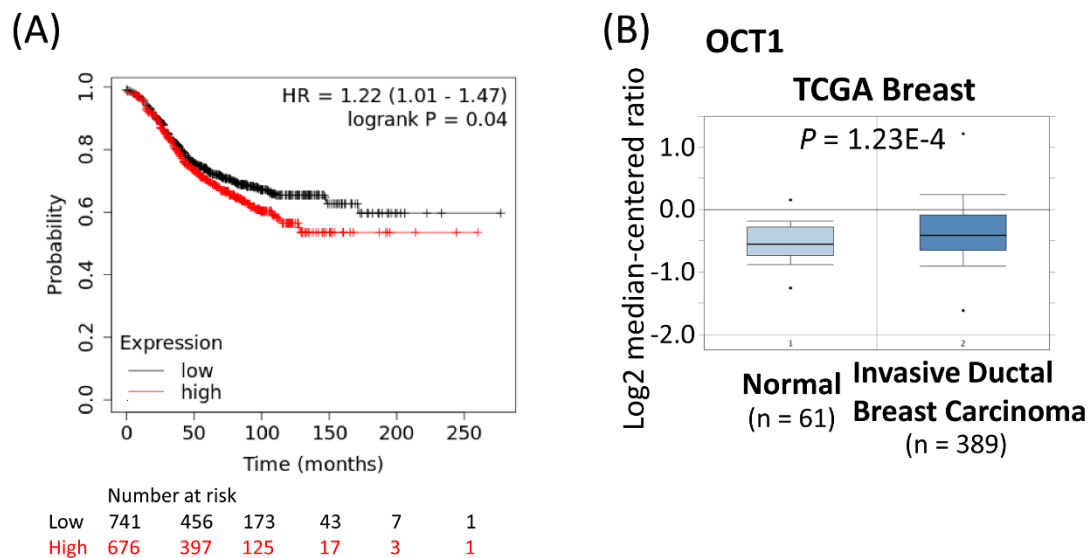

**Figure S2** Analysis of *OCT1* expression using public database. A, Kaplan-Meier survival analysis of the association of recurrence-free survival rate with *OCT1* expression in ER-positive breast cancer patients using Kaplan-Meier Plotter database. Available online: <http://www.kmplot.com> (accessed 25<sup>th</sup> October 2021). Auto-selected best cutoff was employed to split the patients. B, *OCT1* expression levels in invasive ductal breast carcinoma tissues ( $n = 61$ ) was compared with that in normal breast tissues ( $n = 389$ ) using a public database (TCGA Breast) in Oncomine. Available online: <https://www.oncomine.org/resource/login.html> (accessed 25th October 2021).

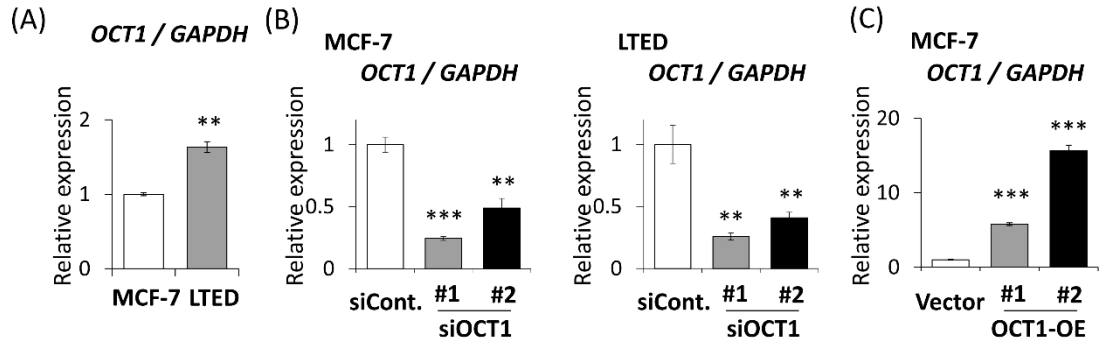

**Figure S3** *OCT1* expression in breast cancer cells. A, Expression of *OCT1* in MCF-7 cells and LTED cells was analyzed by qRT-PCR. The relative mRNA levels were normalized with *GAPDH* expression and presented as mean and SEM ( $n = 3$ ).  $**P < 0.01$ . B, Expression of *OCT1* in MCF-7 cells and LTED cells treated with two kinds of siRNAs for *OCT1* (siOCT1 #1 or #2) or siControl (siCont.) was analyzed by qRT-PCR. The relative mRNA levels were normalized with *GAPDH* expression and presented as mean and SEM ( $n = 3$ ).  $**P < 0.01$ ,  $***P < 0.001$ , compared with cells treated with siControl. C, Expression of *OCT1* in two clones of MCF-7 cells stably expressing *OCT1* (OCT1-OE #1 and #2) and an MCF-7 clone transfected with empty vector (Vector) was analyzed by qRT-PCR. The relative mRNA levels were normalized with *GAPDH* expression and presented as mean and SEM ( $n = 3$ ).  $***P < 0.001$ , compared with Vector.

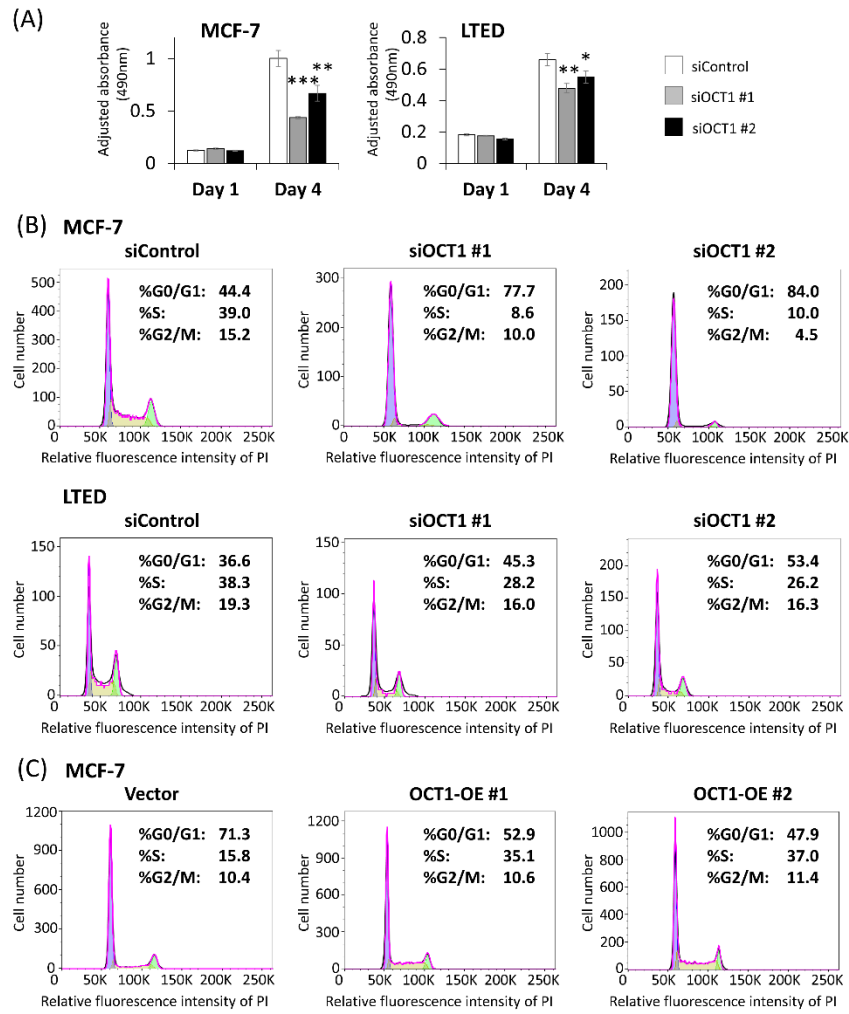

**Figure S4** OCT1 promotes cell proliferation and induces the cell cycle transition from G1 phase to S phase. A, Inhibitory effect by siRNAs for OCT1 on the proliferation of MCF-7 and LTED cells. MTS assay was performed on indicated days after transfection of two kinds of siRNAs for OCT1 (siOCT1 #1 or #2) or siControl. Results are expressed as mean and SEM (n = 4). \* $P < 0.05$ , \*\* $P < 0.01$ , \*\*\* $P < 0.001$ , compared with cells treated with siControl. B, Propidium iodide (PI) histogram plots obtained by flow cytometric analysis of MCF-7 and LTED cells transfected with indicated siRNAs. The proportion of cells in the G0/G1 phase (blue area), S phase (yellow area), and G2/M phase (green area) of the cell cycle was determined by FlowJo software. C, PI histogram plots obtained by flow cytometric analysis of MCF-7 clones stably expressing OCT1 (OCT1-OE #1 and #2) and an MCF-7 clone transfected with empty vector (Vector). The proportion of cells in the G0/G1 phase (blue area), S phase (yellow area), and G2/M phase (green area) of the cell cycle was determined by FlowJo software.

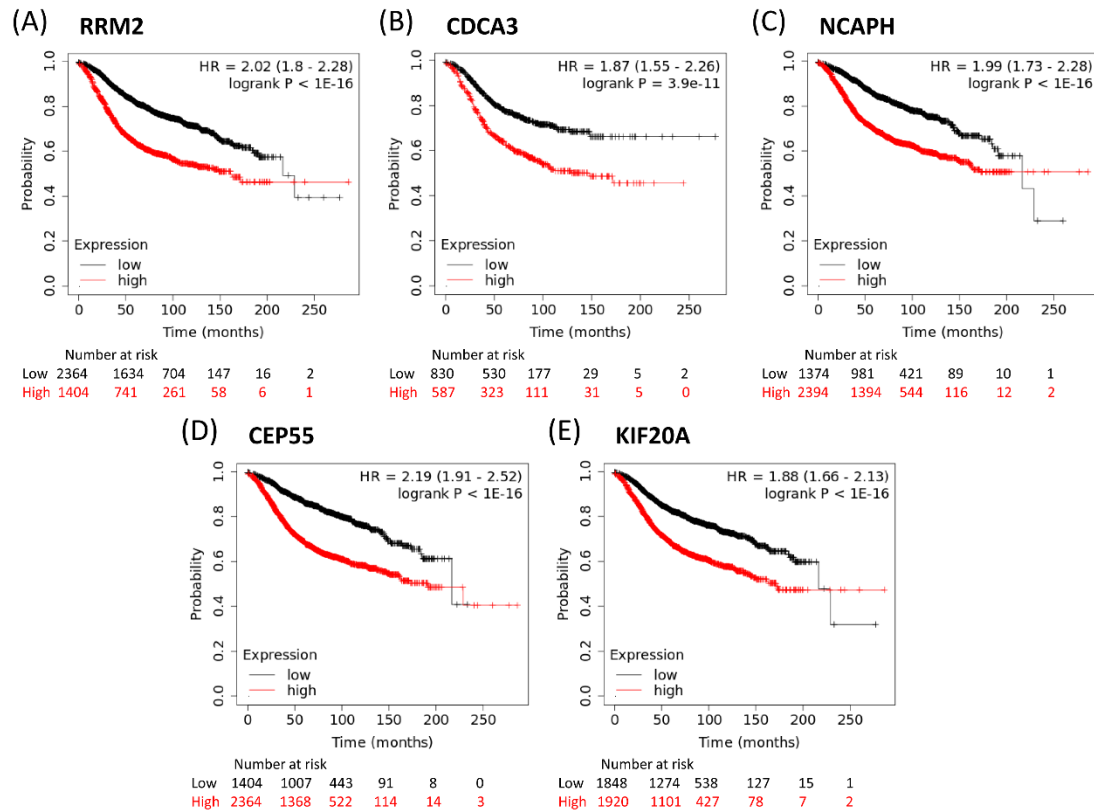

**Figure S5** Kaplan-Meier survival analysis of breast cancer patients for candidate OCT1-target genes identified in the present study. A-E, Analyses of the association of recurrence-free survival rate with expression of indicated genes in ER-positive breast cancer using Kaplan-Meier Plotter database. Available online: <http://www.kmplot.com> (accessed 25<sup>th</sup> October 2021). Auto-selected best cutoff was employed to split the patients.

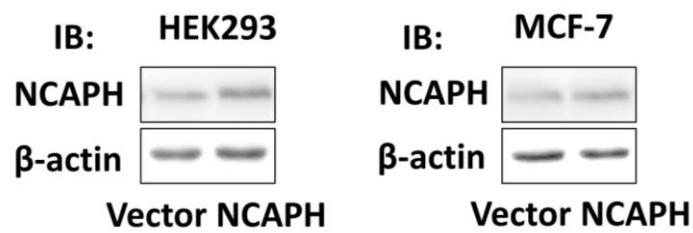

**Figure S6** Specificity of anti-NCAPH antibody. HEK293 cells and MCF-7 cells were transiently transfected with expression vector encoding NCAPH (NCAPH). Empty vector (Vector) was used as a negative control. Cell lysate were separated by SDS-PAGE, and immunoblot analysis was performed. An antibody against  $\beta$ -actin was used as a loading control.



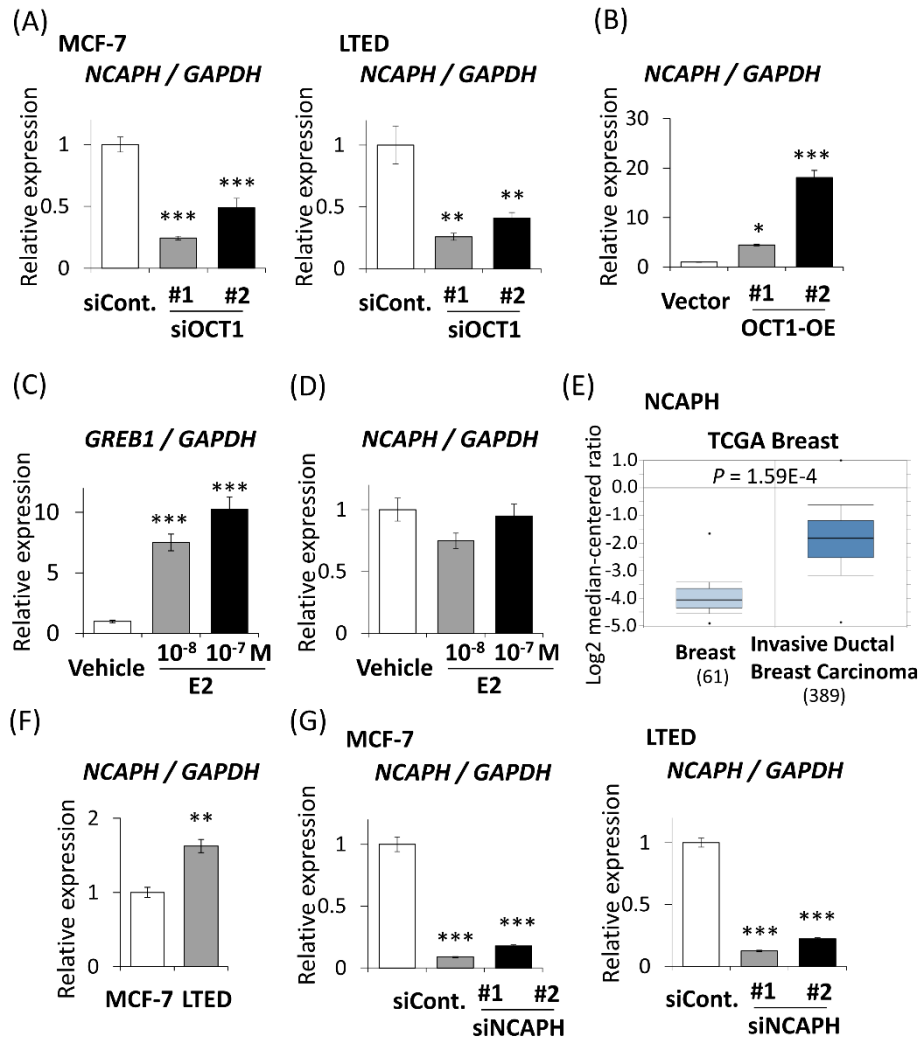

**Figure S7** *NCAPH* expression in breast cancer cells. A, Expression of *NCAPH* in MCF-7 cells and LTED cells treated with two kinds of siRNAs for OCT1 (siOCT1 #1 or #2) or siControl (siCont.) was analyzed by qRT-PCR. The relative mRNA levels were normalized with *GAPDH* expression and presented as mean and SEM (n = 3). \*\* $P < 0.01$ , \*\*\* $P < 0.001$ , compared with cells treated with siControl. B, Expression of *NCAPH* in two clones of MCF-7 cells stably expressing OCT1 (OCT1-OE #1 and #2) and an MCF-7 clone transfected with empty vector (Vector) was analyzed by qRT-PCR. The relative mRNA levels were normalized with *GAPDH* expression and presented as mean and SEM (n = 3). \* $P < 0.05$ , \*\* $P < 0.01$ , compared with Vector. C, MCF-7 cells were treated with the indicated concentrations of 17 $\beta$ -estradiol (E2) or 0.1% ethanol (Vehicle) for 24 h. *GREB1* expression were analyzed by qRT-PCR. The relative mRNA levels were normalized with *GAPDH* expression and presented as mean and SEM (n = 3). \*\*\* $P < 0.001$ , compared with cells treated with ethanol. D, *NCAPH* expression in the same sample as in Figure S5C was analyzed by qRT-PCR. The relative mRNA levels were normalized with *GAPDH* expression and presented as mean and SEM (n = 3). E, *NCAPH* mRNA expression levels in invasive ductal breast carcinoma tissues (n = 61) was compared with that in normal breast tissue (n = 389) using a public database (TCGA Breast) in Oncomine. Available online: <https://www.oncomine.org/resource/login.html> (accessed 25th October 2021). F, Expression of *NCAPH* in MCF-7 cells and LTED cells was analyzed by qRT-PCR. The relative mRNA levels were normalized with *GAPDH* expression and presented as mean and SEM (n = 3). \*\* $P < 0.01$ . G, Expression of *NCAPH* in MCF-7 cells and LTED cells treated with two kinds of siRNAs for *NCAPH* (siNCAPH1 #1 or #2) or siControl (siCont.) was analyzed by qRT-PCR. The relative mRNA levels were normalized with *GAPDH* expression and presented as mean and SEM (n = 3). \*\*\* $P < 0.001$ , compared with cells treated with siControl.

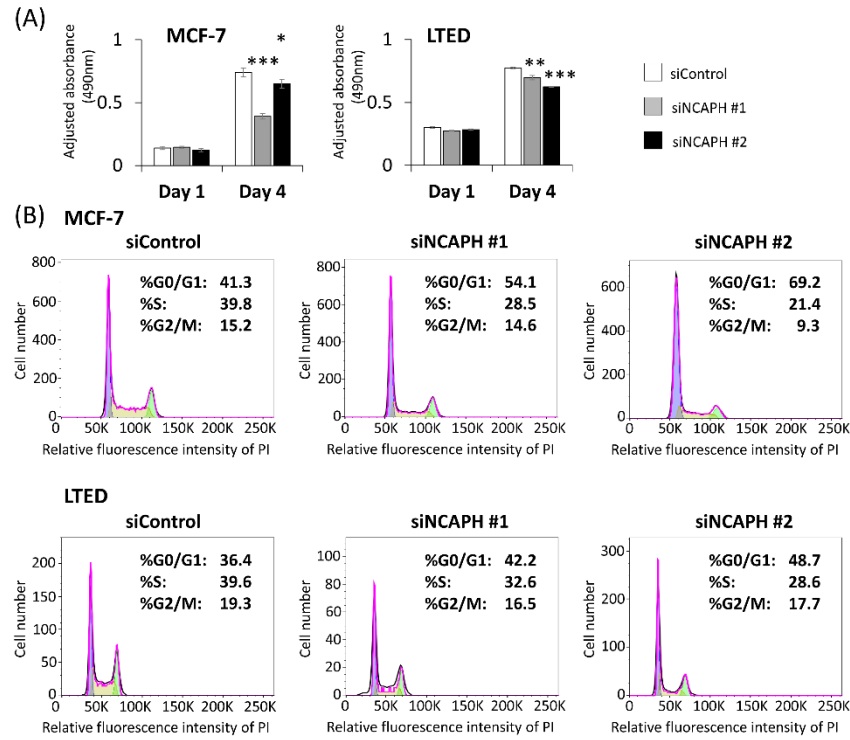

**Figure S8.** Knockdown of NCAPH inhibited the cell cycle transition from G1 phase to S phase. A, Inhibitory effect by siRNAs for NCAPH on the proliferation of MCF-7 and LTED cells. MTS assay was performed on indicated days after transfection of two kinds of siRNAs for NCAPH (siNCAPH #1 or #2) or siControl. Results are expressed as mean and SEM ( $n = 4$ ).  $*P < 0.05$ ,  $**P < 0.01$ ,  $***P < 0.001$ , compared with cells treated with siControl. B, Propidium iodide (PI) histogram plots obtained by flow cytometric analysis of MCF-7 and LTED cells transfected with indicated siRNAs. The proportion of cells in the G0/G1 phase (blue area), S phase (yellow area), and G2/M phase (green area) of the cell cycle was determined by FlowJo software.

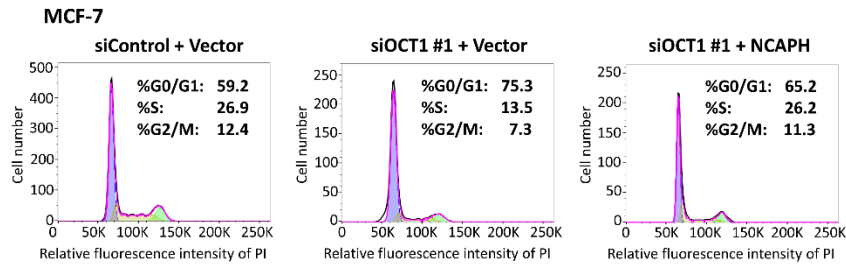

**Figure S9.** Overexpression of NCAPH rescued the suppressed cell cycle transition from G1 phase to S phase by siOCT1. Propidium iodide (PI) histogram plots obtained by flow cytometric analysis of MCF-7 cells transfected with indicated siRNAs were shown. On the next day of transfection with siRNAs (siControl or siOCT1 #1), transfection with expression vector encoding NCAPH (NCAPH) or empty vector (Vector) was performed. The cells were fixed two days after transfection with the vector encoding NCAPH or the empty vector and subjected to the flow cytometric analysis. The proportion of cells in the G0/G1 phase (blue area), S phase (yellow area), and G2/M phase (green area) of the cell cycle was determined by FlowJo software.
